# Supplementary material for: RAFT polymerization of methacrylates containing a tryptophan moiety: controlled synthesis of biocompatible fluorescent cationic chiral polymers with smart pH-responsiveness
Source: Royal Society of Chemistry journal article supplement (doi:10.1039/c2py20821k), 2012-11-06
Supplement: c2py20821k.pdf [file c2py20821k.pdf]

## Supporting Information for

# **RAFT Polymerization of Methacrylates Containing Tryptophan Moiety: Controlled Synthesis of Biocompatible Fluorescent Cationic Chiral Polymers with Smart pH-Responsiveness**

Saswati Ghosh Roy,<sup>a</sup> Rituparna Acharya,<sup>b</sup> Urmi Chatterji,<sup>b</sup> and Priyadarsi De<sup>\*,a</sup>

*<sup>a</sup> Polymer Research Centre, Department of Chemical Sciences, Indian Institute of Science  
Education and Research – Kolkata, PO: BCKV Campus Main Office, Mohanpur - 741252,  
Nadia, West Bengal, India*

*<sup>b</sup> Department of Zoology, University of Calcutta, 35, Ballygunge Circular Road, Kolkata -  
700 019, West Bengal, India*

\* Corresponding author: Fax: +91-33-25873020, E-mail: p\_de@iiserkol.ac.in (P. De).

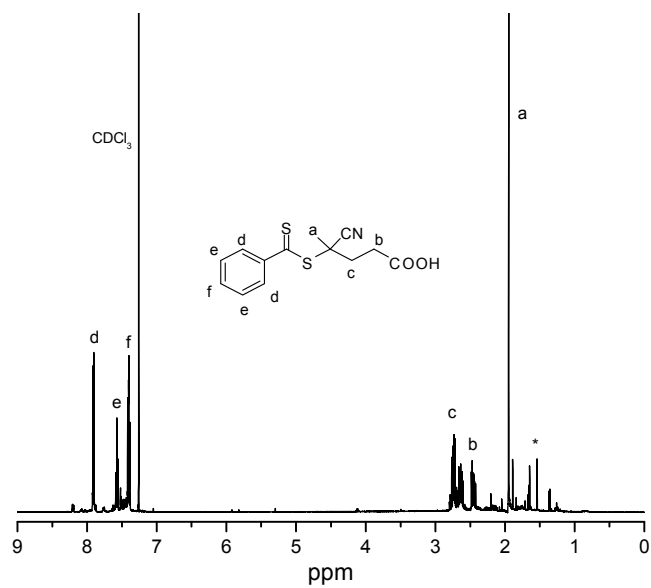

**Fig. S1** <sup>1</sup>H NMR spectrum of CTP in CDCl<sub>3</sub> (\* denotes H<sub>2</sub>O resonance).

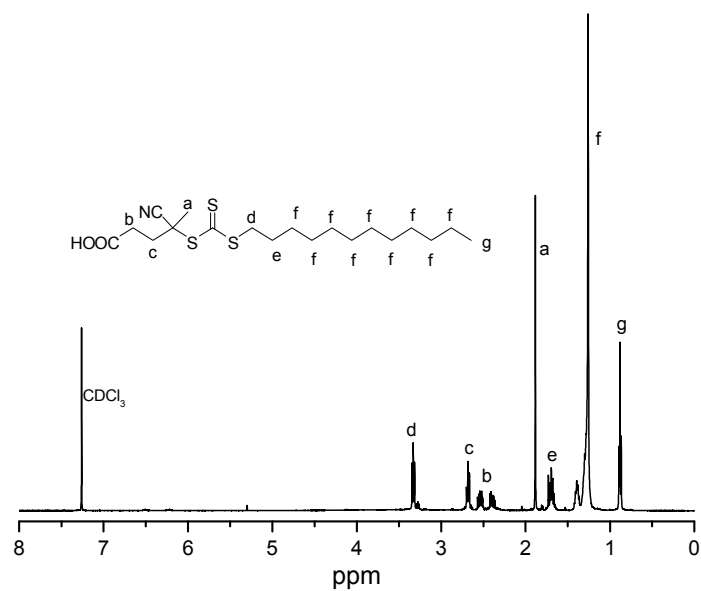

**Fig. S2** <sup>1</sup>H NMR spectrum of CDP in CDCl<sub>3</sub>.

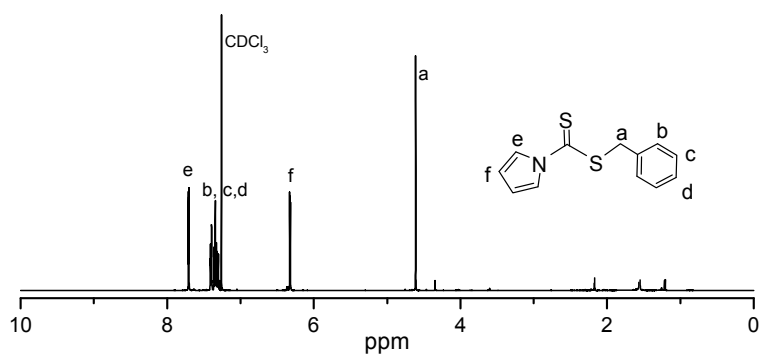

**Fig. S3** <sup>1</sup>H NMR spectrum of BPC in CDCl<sub>3</sub>.

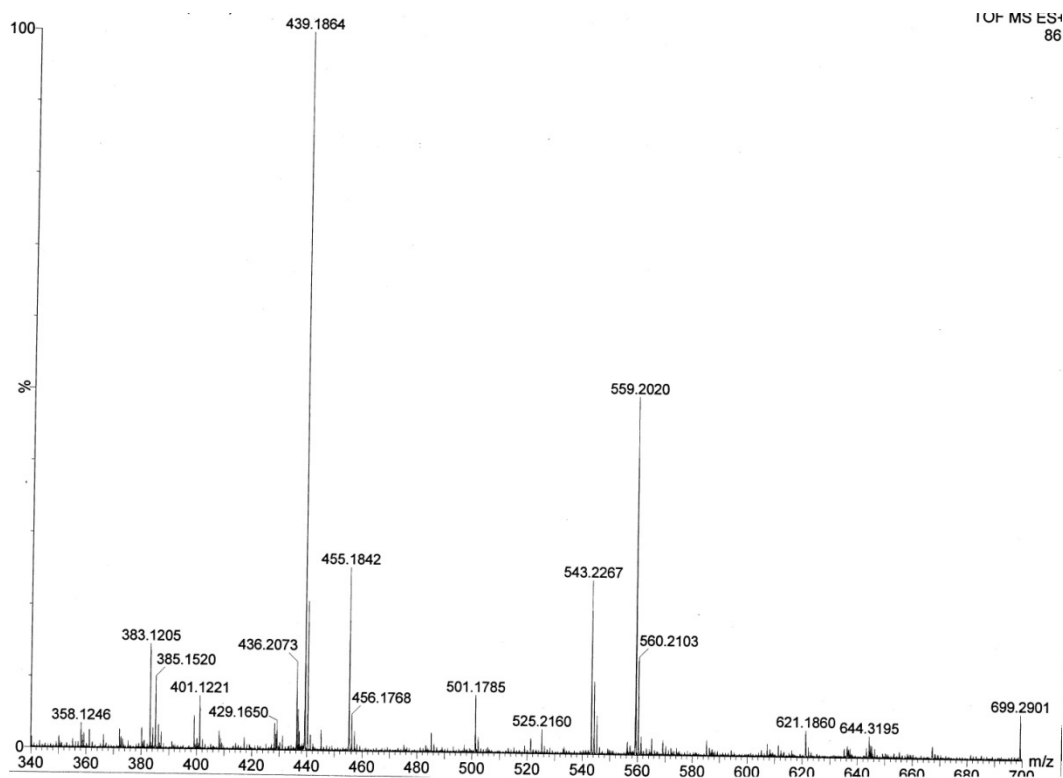

**Fig. S4** The ESI-MS spectrum of Boc-L-Trp-HEMA (calculated for [M + Na<sup>+</sup>]: 439.18 *m/z*, observed: 439.186 *m/z*).

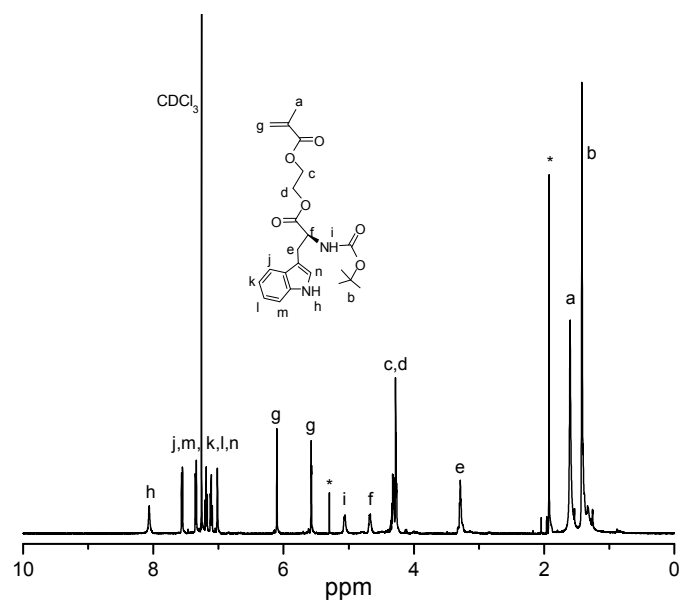

**Fig. S5** The <sup>1</sup>H NMR spectrum of Boc-D-Trp-HEMA in CDCl<sub>3</sub>.

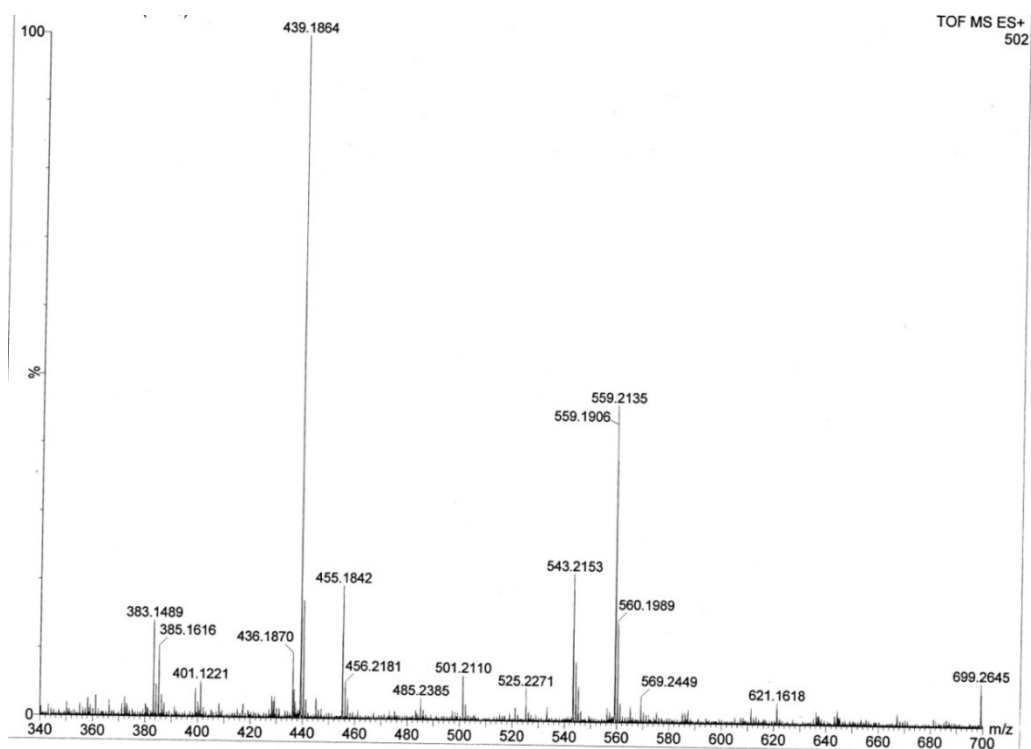

**Fig. S6** The ESI-MS spectrum of Boc-D-Trp-HEMA (calculated for [M + Na<sup>+</sup>]: 439.18 m/z, observed: 439.186 m/z).

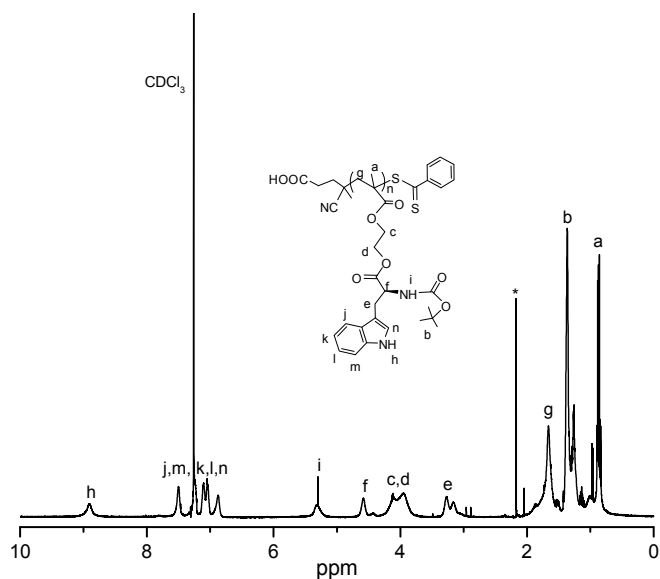

**Fig. S7** The  $^1\text{H}$  NMR spectrum of P(Boc-D-Trp-HEMA) in  $\text{CDCl}_3$ .

**UV-Vis Study of Polymer End-Groups.** Three different concentrations of 4-cyano-4-(thiobenzylthio)pentanoic acid (CTP) were prepared in *N,N*-dimethylformamide (DMF) and their absorbance values were measured at 501 nm. From these data, average molar absorptivity ( $\epsilon$ ) of the dithioester moiety was calculated as  $144.83 \text{ M}^{-1} \text{ cm}^{-1}$  in DMF at  $27^\circ\text{C}$ . Polymer solutions were prepared in DMF and their absorbance at 501 nm was determined. The absorbance at 501 nm and  $\epsilon = 144.83 \text{ M}^{-1} \text{ cm}^{-1}$  provided the concentration of dithioester moiety present in the polymer and from the known weight of the polymer, number average molecular weight ( $M_{n,\text{UV-vis}}$ ) values were determined.

**Table S1** Solubility of P(L-Trp-HEMA) in different solvents.<sup>a</sup>

| Solvent          | Solubility | Solvent         | Solubility |
|------------------|------------|-----------------|------------|
| Water            | +          | THF             | +          |
| Acetone          | +          | Petroleum ether | ×          |
| Chloroform       | ×          | Diethyl ether   | ×          |
| DCM              | ×          | EtOAc           | ×          |
| CCl <sub>4</sub> | ×          | Hexanes         | ×          |
| Methanol         | +          | Benzene         | ×          |
| Ethanol          | +          | Toluene         | ×          |
| DMF              | +          | 1,4-dioxane     | +          |
| DMSO             | +          | Acetonitrile    | +          |

<sup>a</sup> The symbols (+) and (×) indicate soluble and insoluble, respectively.

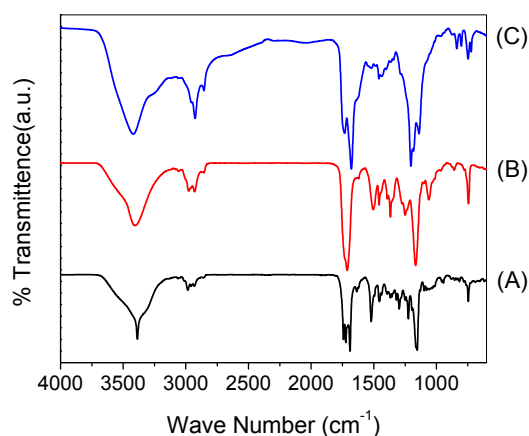

**Fig. 8** FT-IR spectra of (A) Boc-L-Trp-HEMA, (B) P(Boc-L-Trp-HEMA), and (C) P(L-Trp-HEMA).
